# Supplementary material for: Reprogramming of macrophages employing gene regulatory and metabolic network models
Source: PubMed Central journal article supplement (PMC7059956; doi:10.1371/journal.pcbi.1007657), 2020-02-25
Supplement: pcbi.1007657.s013.pdf [file pcbi.1007657.s013.pdf]

**Table S4**

|                     | Gene symbol    | Differential expression of M1 <i>versus</i> M2 from our RNA-seq analysis | Reported gene signature | References  |
|---------------------|----------------|--------------------------------------------------------------------------|-------------------------|-------------|
| M1 associated genes | Ccl2           | M1↑                                                                      | M1↑                     | [1–3]       |
|                     | Ccl3           | M1↑                                                                      | M1↑                     | [1–3]       |
|                     | Ccl4           | M1↑                                                                      | M1↑                     | [1–4]       |
|                     | Ccl5           | M1↑                                                                      | M1↑                     | [1–4]       |
|                     | Ccl8           | M1↑                                                                      | M1↑                     | [2,4]       |
|                     | Ccl9           | M1↑                                                                      | M1↑                     | [2]         |
|                     | Ccl12          | M1↑                                                                      | M1↑                     | [5]         |
|                     | Cd80           | M1↑                                                                      | M1↑                     | [1,2,4]     |
|                     | Cd86           | M1↑                                                                      | M1↑                     | [1,2,4]     |
|                     | Cxcl9          | M1↑                                                                      | M1↑                     | [1–4,6,7]   |
|                     | Cxcl10         | M1↑                                                                      | M1↑                     | [1–4,6]     |
|                     | Cxcl11         | M1↑                                                                      | M1↑                     | [1–3,6]     |
|                     | Il1b           | M1↑                                                                      | M1↑, TAM↑               | [1,3,4,7]   |
|                     | Il6            | M1↑                                                                      | M1↑, TAM↑               | [1,3,4,6,7] |
|                     | Il12a          | M1↑                                                                      | M1↑                     | [1–4,6]     |
|                     | Il12b          | M1↑                                                                      | M1↑                     | [1–4,6,7]   |
|                     | Il15           | M1↑                                                                      | M1↑                     | [8]         |
|                     | Il18           | M1↑                                                                      | TAM↑                    | [4]         |
|                     | Il27           | M1↑                                                                      | M1↑                     | [6]         |
|                     | Mif            | M1↑                                                                      | TAM↑                    | [4]         |
| Stat1               | M1↑            | M1↑                                                                      | [2,6]                   |             |
| Tnf                 | M1↑            | M1↑                                                                      | [1–4,6]                 |             |
| M2 associated genes | Chil3 (Ym1)    | M2↑                                                                      | M2↑                     | [2–4,6]     |
|                     | Clec10a        | M2↑                                                                      | M2↑, M1↓                | [3,7]       |
|                     | Itgax (Cd11c)  | M2↑                                                                      | M1↑                     | [9]         |
|                     | Egr2           | M2↑                                                                      | M1↓                     | [7]         |
|                     | Fcgr2          | M2↑                                                                      | M2↑                     | [3]         |
|                     | Fcgr3          | M2↑                                                                      | M2↑                     | [3]         |
|                     | Mrc1           | M2↑                                                                      | M2↑, M1↓                | [3,6,7]     |
|                     | Retnla (Fizz1) | M2↑                                                                      | M2↑, M1↓                | [1–4,6,7]   |
|                     | Stab1          | M2↑                                                                      | M2↑                     | [2,6]       |
|                     | Stat6          | M2↑                                                                      | M2↑                     | [3,6]       |
|                     | Tgfb2          | M2↑                                                                      | M2↑                     | [2,4,6]     |
|                     | Tgm2           | M1↑                                                                      | M2↑                     | [2,6]       |
|                     | Vegfa          | M1↑                                                                      | M2↑                     | [2]         |
|                     | Vegfb          | M2↑                                                                      | CD68+ macrophages↑      | [10]        |

## References

1. Mantovani A, Sica A, Sozzani S, Allavena P, Vecchi A, Locati M. The chemokine system in diverse forms of macrophage activation and polarization. *Trends in Immunology*. 2004. pp. 677–686. doi:10.1016/j.it.2004.09.015
2. Klopffleisch R. Macrophage reaction against biomaterials in the mouse model – Phenotypes, functions and markers. *Acta Biomaterialia*. 2016. pp. 3–13. doi:10.1016/j.actbio.2016.07.003
3. Gordon S, Martinez FO. The M1 and M2 paradigm of macrophage activation: time for reassessment. *F1000Prime Rep*. 2014;6: 13.
4. Poh AR, Ernst M. Targeting macrophages in cancer: from bench to bedside. *Front Oncol*. 2018;8: 49. doi:10.3389/fonc.2018.00049
5. Zhang F, Wang H, Wang X, Jiang G, Liu H, Zhang G, et al. TGF- $\beta$  induces M2-like macrophage polarization via SNAIL-mediated suppression of a pro-inflammatory phenotype. *Oncotarget*. 2016;7: 52294–52306. doi:10.18632/oncotarget.10561
6. Murray PJ, Allen JE, Biswas SK, Fisher EA, Gilroy DW, Goerdts S, et al. Macrophage activation and polarization: nomenclature and experimental guidelines. *Immunity*. 2014. pp. 14–20. doi:10.1016/j.immuni.2014.06.008
7. Jablonski KA, Amici SA, Webb LM, Ruiz-Rosado JDD, Popovich PG, Partida-Sanchez S, et al. Novel markers to delineate murine M1 and M2 macrophages. *PLoS One*. 2015;10: e0145342. doi:10.1371/journal.pone.0145342
8. Mattioli I, Pesant M, Tentorio PF, Molgora M, Marcenaro E, Lugli E, et al. Priming of human resting NK cells by autologous M1 macrophages via the engagement of IL-1 $\beta$ , IFN- $\beta$ , and IL-15 pathways. *J Immunol*. 2015;195: 2818–2828. doi:10.4049/jimmunol.1500325
9. Dempsey WL, Hwu P, Russell DH, Morahan PS. Bone marrow derived macrophages have polyamine and ectoenzyme phenotypes distinct from resident macrophages. *Life Sci*. 1988;42: 2019–2027. doi:10.1016/0024-3205(88)90502-4
10. Boer K, Troost D, Spliet WGM, Van Rijen PC, Gorter JA, Aronica E. Cellular distribution of vascular endothelial growth factor A (VEGFA) and B (VEGFB) and VEGF receptors 1 and 2 in focal cortical dysplasia type IIB. *Acta Neuropathol*. 2008;115: 683–696. doi:10.1007/s00401-008-0354-6
