# Supplementary material for: Reprogramming of macrophages employing gene regulatory and metabolic network models
Source: PubMed Central journal article supplement (PMC7059956; doi:10.1371/journal.pcbi.1007657), 2020-02-25
Supplement: pcbi.1007657.s015.pdf [file pcbi.1007657.s015.pdf]

**Table S6**

| Gene symbol | log2FoldChange*<br>iM1/M2 | Adjusted P-value**<br>iM1/M2 | log2FoldChange*<br>M1/M2 | Adjusted P-value**<br>M1/M2 | Correctly reprogrammed (Yes/No)*** |
|-------------|---------------------------|------------------------------|--------------------------|-----------------------------|------------------------------------|
| Ccl12       | 2.641                     | 5.20E-10                     | 1.536                    | 3.91E-04                    | Yes                                |
| Ass1****    | 2.324                     | 2.91E-08                     | 2.080                    | 4.32E-07                    | Yes                                |
| Ccl2        | 2.218                     | 2.53E-14                     | 2.463                    | 4.52E-18                    | Yes                                |
| Cxcl10      | 2.178                     | 2.20E-07                     | 0.756                    | 9.46E-02                    | No                                 |
| Ccl5        | 2.093                     | 1.59E-06                     | 4.639                    | 5.81E-30                    | Yes                                |
| Nos2        | 2.018                     | 2.44E-07                     | 8.796                    | 1.00E-136                   | Yes                                |
| Tnf         | 1.841                     | 4.05E-21                     | 1.583                    | 2.80E-16                    | Yes                                |
| Ccl4        | 1.777                     | 2.52E-10                     | 0.214                    | 5.41E-01                    | No                                 |
| Ccl8        | 1.687                     | 6.66E-05                     | 2.560                    | 6.27E-11                    | Yes                                |
| Cd86        | 1.531                     | 5.09E-29                     | 3.932                    | 2.85E-212                   | Yes                                |
| Il6         | 1.388                     | 2.63E-03                     | 1.514                    | 4.84E-04                    | Yes                                |
| Cd80        | 1.134                     | 1.05E-12                     | 1.259                    | 2.65E-16                    | Yes                                |
| Slc2a6      | 1.130                     | 4.88E-14                     | 0.785                    | 1.76E-07                    | Yes                                |
| Ccl3        | 1.123                     | 1.23E-19                     | -0.935                   | 1.24E-13                    | No                                 |
| Cxcl9       | 1.079                     | 2.44E-02                     | 5.861                    | 1.12E-48                    | Yes                                |
| Stat1       | 0.978                     | 2.20E-18                     | 1.406                    | 2.93E-38                    | Yes                                |
| Mif         | 0.826                     | 2.35E-03                     | 1.369                    | 1.90E-08                    | Yes                                |
| Il27        | 0.794                     | 3.08E-02                     | 2.649                    | 5.22E-19                    | Yes                                |
| Tgm2        | 0.701                     | 5.87E-09                     | 1.952                    | 9.45E-67                    | Yes                                |
| Cxcl11      | 0.661                     | 1                            | 0.205                    | 5.14E-01                    | No                                 |
| Pfkl        | 0.532                     | 6.17E-06                     | 0.788                    | 1.38E-12                    | Yes                                |
| Il15        | 0.449                     | 5.93E-03                     | 0.504                    | 8.82E-04                    | Yes                                |
| Slc2a1      | 0.421                     | 8.98E-06                     | 1.176                    | 5.40E-42                    | Yes                                |
| Arg1        | 0.411                     | 4.82E-01                     | 0.613                    | 2.09E-01                    | No                                 |
| Hk2         | 0.359                     | 1.33E-06                     | 1.411                    | 2.70E-97                    | Yes                                |
| Adsl        | 0.304                     | 2.64E-02                     | 0.213                    | 1.11E-01                    | No                                 |
| Prkab1      | 0.296                     | 1.86E-03                     | 0.448                    | 2.23E-07                    | Yes                                |
| Sdhd        | 0.289                     | 2.44E-03                     | 0.591                    | 5.44E-12                    | Yes                                |
| Eno1        | 0.283                     | 3.43E-02                     | 1.045                    | 2.80E-21                    | Yes                                |
| Vegfb       | 0.239                     | 1.25E-01                     | -0.242                   | 9.08E-02                    | No                                 |
| Mdh2        | 0.185                     | 6.21E-03                     | 0.098                    | 1.54E-01                    | No                                 |
| Pfas        | 0.172                     | 2.75E-01                     | 0.243                    | 6.93E-02                    | No                                 |
| Gapdh       | 0.166                     | 4.19E-01                     | 0.934                    | 9.64E-11                    | No                                 |
| Got1        | 0.163                     | 1.13E-01                     | -0.017                   | 8.88E-01                    | No                                 |
| Stab1       | 0.137                     | 7.32E-01                     | -0.779                   | 4.85E-03                    | No                                 |
| Dlat        | 0.129                     | 1.08E-01                     | 0.035                    | 6.86E-01                    | No                                 |
| Suclg1      | 0.127                     | 3.73E-01                     | 0.183                    | 1.28E-01                    | No                                 |
| Tpi1        | 0.120                     | 1.63E-01                     | 0.886                    | 2.09E-39                    | No                                 |
| Aco2        | 0.107                     | 1.92E-01                     | -0.016                   | 8.58E-01                    | No                                 |
| Prkaa1      | 0.092                     | 4.09E-01                     | -0.171                   | 6.16E-02                    | No                                 |
| Hk1         | 0.091                     | 4.73E-01                     | 0.707                    | 3.84E-15                    | No                                 |
| Bpgm        | 0.088                     | 6.78E-01                     | 0.555                    | 8.14E-05                    | No                                 |
| Dlst        | 0.078                     | 2.23E-01                     | 0.199                    | 9.77E-05                    | No                                 |

|        |        |          |        |           |     |
|--------|--------|----------|--------|-----------|-----|
| Slc2a9 | 0.062  | 8.01E-01 | 0.592  | 1.01E-04  | No  |
| Pgm1   | 0.053  | 6.81E-01 | 0.117  | 2.41E-01  | No  |
| Got2   | 0.041  | 7.60E-01 | 0.642  | 1.90E-14  | No  |
| Prkag1 | 0.032  | 8.80E-01 | 0.257  | 6.38E-02  | No  |
| Sdhc   | 0.029  | 8.61E-01 | 0.023  | 8.70E-01  | No  |
| Pgk1   | 0.028  | 8.65E-01 | 0.819  | 2.57E-18  | No  |
| Prps1  | 0.022  | 9.34E-01 | 0.330  | 4.49E-02  | No  |
| Il1b   | 0.007  | 9.94E-01 | 0.764  | 1.06E-01  | No  |
| Il12b  | 0.000  | 1        | 1.225  | 3.02E-04  | No  |
| Asl    | -0.028 | 8.35E-01 | -0.464 | 3.34E-08  | No  |
| Mdh1   | -0.059 | 6.90E-01 | 0.066  | 6.01E-01  | No  |
| Acox3  | -0.059 | 5.72E-01 | -0.183 | 1.92E-02  | No  |
| Idh3a  | -0.077 | 5.88E-01 | 0.067  | 5.86E-01  | No  |
| Pdha1  | -0.089 | 2.74E-01 | 0.181  | 5.38E-03  | No  |
| Ccl9   | -0.089 | 8.06E-01 | -5.613 | 1.82E-132 | No  |
| Idh3g  | -0.096 | 4.63E-01 | -0.283 | 4.99E-03  | No  |
| Il12a  | -0.096 | 1        | 0.517  | 1         | No  |
| Gart   | -0.096 | 4.25E-01 | -0.267 | 4.52E-03  | No  |
| Sdha   | -0.110 | 7.50E-02 | -0.299 | 1.24E-08  | No  |
| Fh1    | -0.120 | 4.07E-01 | -0.444 | 5.93E-05  | No  |
| Gpi1   | -0.134 | 2.61E-01 | 0.131  | 2.21E-01  | No  |
| Pgm2   | -0.138 | 1.99E-01 | 0.008  | 9.45E-01  | No  |
| Sucla2 | -0.142 | 1.46E-01 | -0.223 | 8.06E-03  | No  |
| Gpt    | -0.143 | 5.82E-01 | 0.017  | 9.48E-01  | No  |
| Fcgr2b | -0.154 | 3.69E-01 | -1.594 | 2.09E-36  | No  |
| Acat1  | -0.161 | 2.11E-01 | -0.097 | 4.29E-01  | No  |
| Ldha   | -0.162 | 1.44E-01 | 0.730  | 1.16E-16  | No  |
| Prkab2 | -0.171 | 3.97E-01 | 0.194  | 2.54E-01  | No  |
| Il18   | -0.190 | 4.85E-01 | -0.096 | 7.05E-01  | No  |
| Pfkp   | -0.214 | 1.08E-01 | 0.502  | 7.33E-06  | No  |
| Idh2   | -0.215 | 5.00E-02 | -0.564 | 2.82E-09  | Yes |
| Hk3    | -0.218 | 5.24E-04 | 0.613  | 3.42E-27  | No  |
| Ogdh   | -0.222 | 3.66E-03 | -0.836 | 1.17E-34  | Yes |
| Mrc1   | -0.226 | 2.09E-01 | -3.662 | 7.34E-147 | No  |
| Acox1  | -0.238 | 3.65E-04 | -0.130 | 5.26E-02  | No  |
| Acadl  | -0.258 | 2.63E-03 | -0.359 | 5.78E-06  | Yes |
| Ppat   | -0.261 | 3.88E-02 | -0.239 | 4.15E-02  | Yes |
| Pgam1  | -0.266 | 4.50E-03 | 0.366  | 1.56E-05  | No  |
| Acadm  | -0.273 | 9.66E-05 | -0.409 | 4.29E-10  | Yes |
| Egr2   | -0.282 | 3.81E-02 | -2.801 | 2.14E-123 | Yes |
| Aco1   | -0.286 | 1.84E-04 | -0.703 | 1.89E-23  | Yes |
| Prkag2 | -0.297 | 1.88E-02 | -0.095 | 4.83E-01  | No  |
| Suclg2 | -0.325 | 2.45E-01 | -0.267 | 2.92E-01  | No  |
| Atic   | -0.347 | 4.18E-06 | -0.616 | 5.26E-18  | Yes |
| Vegfa  | -0.371 | 1.34E-01 | 1.446  | 5.90E-13  | No  |
| Aldoa  | -0.383 | 4.38E-05 | -0.308 | 7.90E-04  | Yes |
| Fcgr3  | -0.386 | 1.25E-04 | -0.151 | 1.57E-01  | No  |

|         |        |          |        |           |     |
|---------|--------|----------|--------|-----------|-----|
| Gpt2    | -0.394 | 4.05E-03 | -0.339 | 9.16E-03  | Yes |
| Glud1   | -0.412 | 1.02E-14 | -0.778 | 1.69E-51  | Yes |
| Acly    | -0.450 | 8.20E-11 | -0.519 | 1.14E-14  | Yes |
| Pck2    | -0.476 | 2.29E-01 | -0.601 | 8.26E-02  | No  |
| Ilgax   | -0.495 | 1.38E-02 | -4.880 | 1.10E-174 | Yes |
| Slc2a8  | -0.509 | 1.43E-04 | -0.004 | 9.82E-01  | No  |
| Paics   | -0.532 | 4.54E-17 | -0.318 | 3.64E-07  | Yes |
| Eno2    | -0.603 | 1.88E-05 | -1.696 | 1.76E-37  | Yes |
| Glul    | -0.661 | 9.66E-34 | -1.304 | 5.50E-126 | Yes |
| Chil3   | -0.702 | 5.20E-04 | -6.943 | 4.40E-287 | Yes |
| Cd36    | -0.730 | 4.64E-08 | -3.206 | 3.37E-145 | Yes |
| Idh1    | -0.732 | 1.58E-19 | -2.158 | 3.60E-162 | Yes |
| Ldhb    | -0.742 | 1.81E-04 | -0.288 | 1.60E-01  | No  |
| Prps2   | -0.753 | 1.74E-06 | 0.206  | 2.19E-01  | No  |
| Stat6   | -0.863 | 6.11E-20 | -0.045 | 7.13E-01  | No  |
| Acaca   | -1.021 | 8.10E-25 | -1.305 | 2.07E-40  | Yes |
| Retnla  | -1.085 | 1.82E-02 | -4.231 | 1.34E-26  | Yes |
| Clec10a | -1.613 | 1.35E-12 | -1.772 | 1.46E-15  | Yes |
| Fasn    | -1.804 | 9.88E-26 | -3.268 | 4.61E-81  | Yes |
| Tgfb2   | -1.941 | 4.69E-16 | -2.003 | 7.46E-18  | Yes |
| Scd1    | -2.977 | 6.70E-43 | -5.340 | 5.25E-113 | Yes |
| Scd2    | -3.117 | 9.94E-38 | -3.308 | 2.13E-43  | Yes |

\* DESeq2 was used for differential expression analysis. The reported result comprises the gene signature between iM1 and M2-like (mock treated) macrophages and M1 (mock treated) and M2-like (mock treated) macrophages.

\*\* The Benjamini-Hochberg method was used for multiple testing correction

\*\*\* Compared to the differential expression of the M1-like and M2-like macrophages not treated with the transfection reagent

\*\*\*\* Enzyme coding genes are highlighted in gray
