# Supplementary material for: Reprogramming of macrophages employing gene regulatory and metabolic network models
Source: PLOS journal article supplement (doi:10.1371/journal.pcbi.1007657), 2020-02-25
Supplement: S14 (10.1371/journal.pcbi.1007657.s014) [file journal.pcbi.1007657.s014]

**Table S5**

|               | <b>iM1 versus M2<sup>neg-siPool</sup></b><br><b>(qPCR)</b> |     |     | <b>log2FC M1 versus M2</b><br><b>(adj. p value &lt; 0.05)**</b> |
|---------------|------------------------------------------------------------|-----|-----|-----------------------------------------------------------------|
|               | 24h*                                                       | 48h | 72h |                                                                 |
| <b>Cd86</b>   | 2                                                          | 2   | 0   | 5.9                                                             |
| <b>Cxcl10</b> | 2                                                          | 2   | 0   | 12.7                                                            |
| <b>Cxcl9</b>  | 2                                                          | 2   | 0   | 13.1                                                            |
| <b>Il12b</b>  | 2                                                          | 1   | 0   | 11.3                                                            |
| <b>Il1b</b>   | 2                                                          | 2   | 2   | 9.1                                                             |
| <b>Ldha</b>   | -1                                                         | 0   | -2  | 2.4                                                             |
| <b>Nos2</b>   | 2                                                          | 2   | 2   | 13.5                                                            |
| <b>Stat1</b>  | 2                                                          | 2   | 0   | 3.8                                                             |
| <b>Arg1</b>   | -2                                                         | 0   | 0   | -1.5                                                            |
| <b>Fizz1</b>  | -2                                                         | -2  | -2  | -3.5                                                            |
| <b>Mrc1</b>   | -2                                                         | -2  | 0   | -7.3                                                            |
| <b>Ppat</b>   | 2                                                          | 0   | -2  | -1.1                                                            |
| <b>Tgfb</b>   | -1                                                         | 0   | -2  | -0.8                                                            |
| <b>Ym1</b>    | -2                                                         | -2  | -2  | -8.3                                                            |

\* Transcriptional changes of M1 and M2 associated genes relative to M2 macrophages treated with a negative siRNA pool were experimentally determined by quantitative PCR. Samples were extracted 24 h, 48 h and 72 h after siRNA treatment (two replicates). Upregulation or downregulation of a gene was scored for each replicate by 1 or -1, respectively.

\*\* 24 hours after siRNA treatment
